# Supplementary material for: Comparison of underwater and conventional endoscopic mucosal resection for removing sessile colorectal polyps: a propensity-score matched cohort study
Source: PubMed Central journal article supplement — Endosc Int Open. 2019 Oct 31;7(11):E1528–36. doi: 10.1055/a-1007-1578 (PMC6823098; doi:10.1055/a-1007-1578), 2019-10-31

Supplementary Material

Supplement Table 1. Sensitivity analysis in Patient and Polyp Characteristics

|                    | Original Cohort |             |      |      | Propensity Score Matched Cohort* |             |      |     |
|--------------------|-----------------|-------------|------|------|----------------------------------|-------------|------|-----|
|                    | EMR             | UEMR        | d    | p    | EMR                              | UEMR        | d    | p   |
| No. of polyps      | 157             | 158         |      |      | 114                              | 114         |      |     |
| Age (mean, SD)     | 63.4 (9.7)      | 65.2 (11.8) | .17  | .14  | 63.2 (9.5)                       | 64.0 (12.1) | .07  | .59 |
| Sex                |                 |             | .06  | .61  |                                  |             | .07  | .58 |
| Male               | 96 (61.1)       | 101 (63.9)  |      |      | 70 (61.4)                        | 74 (64.9)   |      |     |
| Female             | 61 (38.9)       | 57 (36.1)   |      |      | 44 (38.6)                        | 40 (35.1)   |      |     |
| Colon preparation  |                 |             | -.22 | .05  |                                  |             | .10  | .40 |
| Good-excellent     | 144 (91.7)      | 153 (96.8)  |      |      | 112 (98.2)                       | 110 (96.5)  |      |     |
| Fair               | 13 (8.3)        | 5 (3.2)     |      |      | 2 (1.8)                          | 4 (3.5)     |      |     |
| Polyp location     |                 |             | .02  | .87  |                                  |             | -.14 | .28 |
| Left Colon         | 70 (44.3)       | 69 (43.9)   |      |      | 45 (39.5)                        | 53 (46.5)   |      |     |
| Right Colon        | 87 (55.1)       | 89 (56.7)   |      |      | 69 (60.5)                        | 61 (53.5)   |      |     |
| Polyp size         |                 |             | .39  | <.01 |                                  |             | .03  | .66 |
| Mean (SD)          | 15.7 (6.1)      | 18.2 (7.7)  |      |      | 16.2 (6.7)                       | 16.7 (6.8)  |      |     |
| Group              |                 |             | .35  | .02  |                                  |             | .16  | .69 |
| 10-19 mm           | 112 (71.3)      | 88 (55.7)   |      |      | 75 (65.8)                        | 73 (64)     |      |     |
| 20-24 mm           | 31 (19.7)       | 41 (25.9)   |      |      | 26 (22.8)                        | 31 (27.2)   |      |     |
| 25-29 mm           | 8 (5.1)         | 17 (10.8)   |      |      | 7 (6.1)                          | 7 (6.1)     |      |     |
| > 30 mm            | 6 (3.8)         | 12 (7.6)    |      |      | 6 (5.3)                          | 3 (2.6)     |      |     |
| Polyp morphology   |                 |             | .23  | .24  |                                  |             | .06  | .96 |
| Type 0-Is          | 66 (42)         | 50 (31.6)   |      |      | 43 (37.7)                        | 46 (40.4)   |      |     |
| Type IIa (LST-G)   | 29 (18.5)       | 36 (22.8)   |      |      | 21 (18.4)                        | 21 (18.4)   |      |     |
| Type IIa (LST-NG)  | 42 (26.8)       | 53 (33.5)   |      |      | 35 (30.7)                        | 34 (29.8)   |      |     |
| SSA/P (> 10 mm)    | 20 (12.7)       | 19 (12)     |      |      | 15 (13.2)                        | 13 (11.4)   |      |     |
| Prior manipulation |                 |             | .19  | .09  |                                  |             | .06  | .66 |

|                             | Original Cohort |            |     |      | Propensity Score Matched Cohort* |           |     |     |
|-----------------------------|-----------------|------------|-----|------|----------------------------------|-----------|-----|-----|
|                             | EMR             | UEMR       | d   | p    | EMR                              | UEMR      | d   | p   |
| None                        | 116 (73.9)      | 103 (65.2) |     |      | 81 (71.1)                        | 78 (68.4) |     |     |
| Yes                         | 41 (26.1)       | 55 (34.8)  |     |      | 33 (28.9)                        | 36 (31.6) |     |     |
| Polyp pathology             |                 |            | .26 | .27  |                                  |           | .10 | .98 |
| Adenoma without HGD         | 76 (48.4)       | 70 (44.3)  |     |      | 56 (49.1)                        | 54 (47.4) |     |     |
| HGD or CIS                  | 54 (34.4)       | 62 (39.2)  |     |      | 39 (34.2)                        | 42 (36.8) |     |     |
| Adenocarcinoma (T1-shallow) | 1 (0.6)         | 5 (3.2)    |     |      | 1 (0.9)                          | 2 (1.8)   |     |     |
| Adenocarcinoma (T1-deep)    | 3 (1.9)         | 5 (3.2)    |     |      | 3 (2.6)                          | 3 (2.6)   |     |     |
| SSA/P                       | 23 (14.6)       | 16 (10.1)  |     |      | 15 (13.2)                        | 13 (11.4) |     |     |
| Water jet scope             |                 |            | .53 | <.01 |                                  |           | .01 | .88 |
| No                          | 125 (79.6)      | 88 (55.7)  |     |      | 83 (72.8)                        | 82 (71.9) |     |     |
| Yes                         | 32 (20.4)       | 70 (44.3)  |     |      | 31 (27.2)                        | 32 (28.1) |     |     |

\* Variables in the propensity score included age, sex, colon preparation, polyp location, polyp size, polyp morphology, polyp pathology, usage of water jet, and prior endoscopic manipulation of the target polyp  
EMR: standard endoscopic mucosal resection; UEMR: underwater endoscopic mucosal resection; d: standardized difference; SD: standard deviation; d: standardized difference; LST-G: granular type lateral spreading tumor; LST-NG: non-granular type lateral spreading tumor; SSA/P: sessile serrated adenoma/polyp; HGD: high-grade dysplasia; CIS: carcinoma *in situ*

Supplement Table 2. Sensitivity analysis in Comparison of Resection Outcomes

|                     | Original Cohort |            |                           | Propensity Score Matched Cohort |            |                           |
|---------------------|-----------------|------------|---------------------------|---------------------------------|------------|---------------------------|
|                     | EMR             | UEMR       | Difference<br>(95% CI)    | EMR                             | UEMR       | Difference<br>(95% CI)    |
| No. of polyps       | 157             | 158        |                           | 114                             | 114        |                           |
| Resection result    |                 |            |                           |                                 |            |                           |
| En bloc             | 136 (86.6)      | 130 (82.3) | -4.3<br>([-12.3]-3.6)     | 95 (83.3)                       | 100 (87.7) | 4.4<br>([-4.7]-13.5)      |
| Piecemeal           | 21 (13.4)       | 28 (17.7)  |                           | 19 (16.7)                       | 14 (12.3)  |                           |
| Resection time      |                 |            |                           |                                 |            |                           |
| Mean (SD)           | 10.3 (8.2)      | 9.9 (7.8)  | -0.4<br>([-2.1]-1.4)      | 11.1 (8.7)                      | 8.4 (5.9)  | -2.7<br>([-4.6]-[-0.7])   |
| Bleeding            |                 |            |                           |                                 |            |                           |
| Intraprocedural     | 28 (17.8)       | 9 (5.7)    | -12.1<br>([-19.1]-[-5.1]) | 21 (18.4)                       | 4 (3.5)    | -14.9<br>([-22.8]-[-7.0]) |
| Delayed             | 2 (1.3)         | 2 (1.3)    | 0.0<br>([-2.5]-2.5)       | 1 (0.9)                         | 2 (1.8)    | 0.9<br>([-2.1]-3.8)       |
| Colon wall injury   |                 |            |                           |                                 |            |                           |
| Muscle defect       | 2 (1.3)         | 3 (1.9)    | 0.6<br>(-2.2-3.4)         | 2 (1.8)                         | 0 (0)      | -1.8<br>([-4.2]-0.7)      |
| Delayed perforation | 0 (0)           | 1 (0.6)    | 0.6<br>([-0.6]-1.9)       | 0 (0)                           | 1 (0.9)    | 0.9<br>([-0.8]-2.6)       |

EMR: standard endoscopic mucosal resection; UEMR: underwater endoscopic mucosal resection; d: standardized difference; SD: standard deviation

Supplemental Fig. 1 Definition of endoscopic en bloc resection.

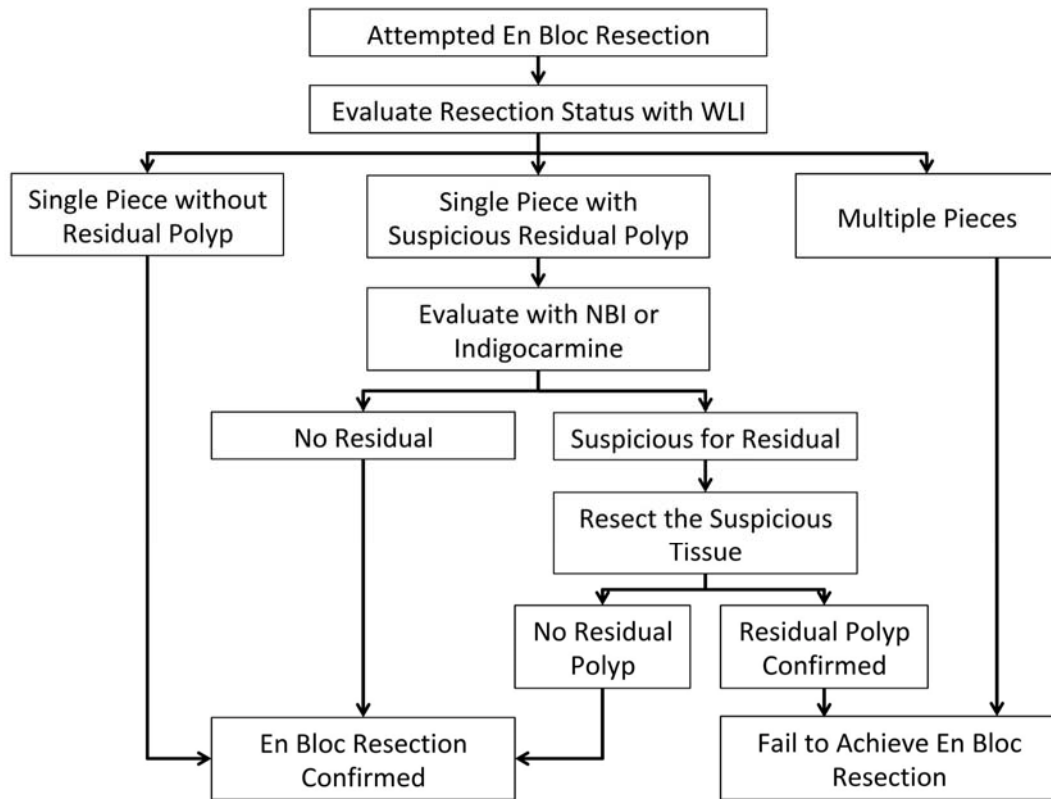

Supplement: 1515supmat-10-1055-a-1007-1578.pdf [file 1515supmat-10-1055-a-1007-1578.pdf]
